# Supplementary material for: Adverse Effects of Oral Cannabidiol: An Updated Systematic Review of Randomized Controlled Trials (2020–2022)
Source: MDPI journal article supplement (doi:10.3390/pharmaceutics14122598), 2022-11-25
Supplement: s1 [file s1]

# Supplemental Online Content

Souza et. al.; Adverse Effects of Oral Cannabidiol: An Updated Systematic Review of Randomized Controlled Trials

## Methodological adaptations compared to the previous review

### Inclusion criteria

**Present review:** Oral purified Cannabidiol formulations ( $\geq 98\%$  CBD).

**Previous review:** Pure CBD or standardized CBD extracts with  $<3\%$  THC.

### Databases

**Present review:** EMBASE, MEDLINE/PubMed, and Web of Science.

**Previous review:** PubMed.

### Terms

**Present review:** "(cannabidiol OR CBD) AND (randomized clinical trial OR double-blind OR placebo-controlled)".

**Previous review:** "(cannabidiol) AND (randomized clinical trial OR double-blind OR placebo controlled)".

**Table S1.** Quality Assessment of Controlled Intervention Studies

| Quality Assessment of Controlled Intervention Studies                                                                                                                |     |    |               |
|----------------------------------------------------------------------------------------------------------------------------------------------------------------------|-----|----|---------------|
| Criteria                                                                                                                                                             | Yes | No | Other         |
|                                                                                                                                                                      |     |    | (CD, NR, NA)* |
| 1. Was the study described as randomized, a randomized trial, a randomized clinical trial, or an RCT?                                                                |     |    |               |
| 2. Was the method of randomization adequate (i.e., use of randomly generated assignment)?                                                                            |     |    |               |
| 3. Was the treatment allocation concealed (so that assignments could not be predicted)?                                                                              |     |    |               |
| 4. Were study participants and providers blinded to treatment group assignment?                                                                                      |     |    |               |
| 5. Were the people assessing the outcomes blinded to the participants' group assignments?                                                                            |     |    |               |
| 6. Were the groups similar at baseline on important characteristics that could affect outcomes (e.g., demographics, risk factors, co-morbid conditions)?             |     |    |               |
| 7. Was the overall drop-out rate from the study at endpoint 20% or lower of the number allocated to treatment?                                                       |     |    |               |
| 8. Was the differential drop-out rate (between treatment groups) at endpoint 15 percentage points or lower?                                                          |     |    |               |
| 9. Was there high adherence to the intervention protocols for each treatment group?                                                                                  |     |    |               |
| 10. Were other interventions avoided or similar in the groups (e.g., similar background treatments)?                                                                 |     |    |               |
| 11. Were outcomes assessed using valid and reliable measures, implemented consistently across all study participants?                                                |     |    |               |
| 12. Did the authors report that the sample size was sufficiently large to be able to detect a difference in the main outcome between groups with at least 80% power? |     |    |               |
| 13. Were outcomes reported or subgroups analyzed prespecified (i.e., identified before analyses were conducted)?                                                     |     |    |               |
| 14. Were all randomized participants analyzed in the group to which they were originally assigned, i.e., did they use an intention-to-treat analysis?                |     |    |               |

The quality of included studies was assessed using the National Institutes of Health (NIH) Quality Assessment of Controlled Intervention Studies (<https://www.nhlbi.nih.gov/health-pro/guidelines/in-develop/cardiовascular-risk-reduction/tools/cohort>).

**Total Score:** Number of yes; **CD**, cannot be determined; **NA**, not applicable; **NR**, not reported.

**Quality Rating:** Poor <50%, Fair 50-75%, Good ≥75%.

## Quality Assessment of Controlled Intervention Studies toll - Items reported in each study

| Appiah-Kusi et al., 2020 [10] |     |    |              |
|-------------------------------|-----|----|--------------|
| Criteria                      | Yes | No | (CD, NR, NA) |
| 1                             |     |    |              |
| 2                             |     |    | NR           |
| 3                             |     |    | NR           |
| 4                             |     |    |              |
| 5                             |     |    |              |
| 6                             |     |    |              |
| 7                             |     |    | NR           |
| 8                             |     |    |              |
| 9                             |     |    |              |
| 10                            |     |    |              |
| 11                            |     |    |              |
| 12                            |     |    |              |
| 13                            |     |    |              |
| 14                            |     |    |              |

| Crippa et al., 2021 [17] |     |    |              |
|--------------------------|-----|----|--------------|
| Criteria                 | Yes | No | (CD, NR, NA) |
| 1                        |     |    |              |
| 2                        |     |    |              |
| 3                        |     |    |              |
| 4                        |     |    |              |
| 5                        |     |    |              |
| 6                        |     |    |              |
| 7                        |     |    |              |
| 8                        |     |    |              |
| 9                        |     |    |              |
| 10                       |     |    |              |
| 11                       |     |    |              |
| 12                       |     |    |              |
| 13                       |     |    |              |
| 14                       |     |    |              |

| Atieh et al., 2022 [21] |     |    |              |
|-------------------------|-----|----|--------------|
| Criteria                | Yes | No | (CD, NR, NA) |
| 1                       |     |    |              |
| 2                       |     |    |              |
| 3                       |     |    |              |
| 4                       |     |    |              |
| 5                       |     |    |              |
| 6                       |     |    |              |
| 7                       |     |    |              |
| 8                       |     |    |              |
| 9                       |     |    |              |
| 10                      |     |    |              |
| 11                      |     |    |              |
| 12                      |     |    |              |
| 13                      |     |    |              |
| 14                      |     |    |              |

| De Almeida et al., 2021 [18] |     |    |              |
|------------------------------|-----|----|--------------|
| Criteria                     | Yes | No | (CD, NR, NA) |
| 1                            |     |    |              |
| 2                            |     |    |              |
| 3                            |     |    | NR           |
| 4                            |     |    |              |
| 5                            |     |    |              |
| 6                            |     |    |              |
| 7                            |     |    |              |
| 8                            |     |    |              |
| 9                            |     |    |              |
| 10                           |     |    |              |
| 11                           |     |    |              |
| 12                           |     |    |              |
| 13                           |     |    |              |
| 14                           |     |    |              |

| Ben-Menachem et al., 2020 [11] |     |    |              |
|--------------------------------|-----|----|--------------|
| Criteria                       | Yes | No | (CD, NR, NA) |
| 1                              |     |    |              |
| 2                              |     |    | NR           |
| 3                              |     |    | NR           |
| 4                              |     |    |              |
| 5                              |     |    |              |
| 6                              |     |    |              |
| 7                              |     |    |              |
| 8                              |     |    |              |
| 9                              |     |    |              |
| 10                             |     |    |              |
| 11                             |     |    |              |
| 12                             |     |    |              |
| 13                             |     |    |              |
| 14                             |     |    |              |

| Efron et al., 2020 [12] |     |    |              |
|-------------------------|-----|----|--------------|
| Criteria                | Yes | No | (CD, NR, NA) |
| 1                       |     |    |              |
| 2                       |     |    | NR           |
| 3                       |     |    |              |
| 4                       |     |    |              |
| 5                       |     |    |              |
| 6                       |     |    |              |
| 7                       |     |    |              |
| 8                       |     |    |              |
| 9                       |     |    |              |
| 10                      |     |    |              |
| 11                      |     |    |              |
| 12                      |     |    |              |
| 13                      |     |    |              |
| 14                      |     |    |              |

| Freeman et al., 2020 [13] |     |    |              |
|---------------------------|-----|----|--------------|
| Criteria                  | Yes | No | (CD, NR, NA) |
| 1                         |     |    |              |
| 2                         |     |    |              |
| 3                         |     |    |              |
| 4                         |     |    |              |
| 5                         |     |    |              |
| 6                         |     |    |              |
| 7                         |     |    |              |
| 8                         |     |    |              |
| 9                         |     |    |              |
| 10                        |     |    |              |
| 11                        |     |    |              |
| 12                        |     |    |              |
| 13                        |     |    |              |
| 14                        |     |    |              |

| Mongeau-Pérusse et al., 2021 [20] |     |    |              |
|-----------------------------------|-----|----|--------------|
| Criteria                          | Yes | No | (CD, NR, NA) |
| 1                                 |     |    |              |
| 2                                 |     |    |              |
| 3                                 |     |    |              |
| 4                                 |     |    |              |
| 5                                 |     |    |              |
| 6                                 |     |    |              |
| 7                                 |     |    |              |
| 8                                 |     |    |              |
| 9                                 |     |    |              |
| 10                                |     |    |              |
| 11                                |     |    |              |
| 12                                |     |    |              |
| 13                                |     |    |              |
| 14                                |     |    |              |

| Leweke et al., 2021 [19] |     |    |              |
|--------------------------|-----|----|--------------|
| Criteria                 | Yes | No | (CD, NR, NA) |
| 1                        |     |    |              |
| 2                        |     |    | NR           |
| 3                        |     |    | NR           |
| 4                        |     |    |              |
| 5                        |     |    |              |
| 6                        |     |    |              |
| 7                        |     |    |              |
| 8                        |     |    |              |
| 9                        |     |    |              |
| 10                       |     |    |              |
| 11                       |     |    |              |
| 12                       |     |    |              |
| 13                       |     |    |              |
| 14                       |     |    |              |

| Thiele et al., 2020 [15] |     |    |              |
|--------------------------|-----|----|--------------|
| Criteria                 | Yes | No | (CD, NR, NA) |
| 1                        |     |    |              |
| 2                        |     |    | NR           |
| 3                        |     |    | NR           |
| 4                        |     |    |              |
| 5                        |     |    |              |
| 6                        |     |    |              |
| 7                        |     |    |              |
| 8                        |     |    |              |
| 9                        |     |    |              |
| 10                       |     |    |              |
| 11                       |     |    |              |
| 12                       |     |    |              |
| 13                       |     |    |              |
| 14                       |     |    |              |

| Meneses-Gaya et al., 2020 [14] |     |    |              |
|--------------------------------|-----|----|--------------|
| Criteria                       | Yes | No | (CD, NR, NA) |
| 1                              |     |    |              |
| 2                              |     |    | NR           |
| 3                              |     |    | NR           |
| 4                              |     |    |              |
| 5                              |     |    |              |
| 6                              |     |    |              |
| 7                              |     |    |              |
| 8                              |     |    |              |
| 9                              |     |    |              |
| 10                             |     |    |              |
| 11                             |     |    |              |
| 12                             |     |    | NR           |
| 13                             |     |    |              |
| 14                             |     |    |              |

| VanLandingham et al., 2020 [16] |     |    |              |
|---------------------------------|-----|----|--------------|
| Criteria                        | Yes | No | (CD, NR, NA) |
| 1                               |     |    |              |
| 2                               |     |    | NR           |
| 3                               |     |    | NR           |
| 4                               |     |    |              |
| 5                               |     |    |              |
| 6                               |     |    |              |
| 7                               |     |    |              |
| 8                               |     |    |              |
| 9                               |     |    |              |
| 10                              |     |    |              |
| 11                              |     |    |              |
| 12                              |     |    |              |
| 13                              |     |    |              |
| 14                              |     |    |              |

**Table S2.** Serious Adverse Events in  $\geq 1$  Patient

| Adverse Effects, No.              | Placebo | CBD20 | CBD25 | CBD50 |
|-----------------------------------|---------|-------|-------|-------|
| Increased ALT/AST                 | -       | 1     | 9     | 19    |
| Seizure                           | 1       | 1     | 3     | 2     |
| Rash                              | -       | 1     | 2     | 2     |
| Vomiting                          | -       | -     | 2     | -     |
| Gastroenteritis                   | -       | -     | 2     | 1     |
| Pneumonia                         | 1       | -     | 2     | -     |
| Abdominal pain                    | -       | -     | -     | 1     |
| Acute respiratory failure         | -       | -     | 1     | -     |
| Angioedema                        | -       | -     | -     | 1     |
| Blood bilirubin increased         | -       | -     | 1     | -     |
| Dehydration                       | -       | -     | -     | 1     |
| Diarrhea                          | -       | -     | -     | 1     |
| Electrolyte imbalance             | -       | -     | 1     | -     |
| Fatigue                           |         | -     | 1     | -     |
| Hepatitis                         | 1       | -     | -     | -     |
| Hypophagia                        | -       | -     | 1     | -     |
| Laceration                        | -       | -     | -     | 1     |
| Liver injury                      | -       | -     | 1     | -     |
| Malaise                           | -       | -     | 1     | -     |
| Nausea                            | -       | -     | 1     | -     |
| Otitis media acute                | -       | -     | 1     | -     |
| Toxicity to various agents        | -       | -     | -     | 1     |
| Type IV hypersensitivity reaction | -       | -     | 1     | -     |

CBD20 20mg/kg/d; CBD25 25mg/kg/d; CBD50 50mg/kg/d.
